# Supplementary material for: Fluorescence microscopy image noise reduction using a stochastically-connected random field model
Source: PubMed Central journal article supplement (PMC4756687; doi:10.1038/srep20640), 2016-02-17
Supplement: srep20640-s1.pdf [file srep20640-s1.pdf]

**Supplementary Information for Fluorescence  
microscopy image noise reduction using a  
stochastically-connected random field model**

S.A. Haider<sup>1,\*</sup>, A. Cameron<sup>1</sup>, P. Siva<sup>1</sup>, D. Lui<sup>1</sup>, M.J. Shafiee<sup>1</sup>, A.  
Boroomand<sup>1</sup>, N. Haider<sup>2</sup>, A. Wong<sup>1</sup>

**1 Vision and Image Processing (VIP) Research Group, Department  
of Systems Design Engineering, University of Waterloo, 200  
University Avenue W, Waterloo, ON, N2T 3G1, Canada**

**2 Department of Medical Biophysics, University of Toronto, 610  
University Avenue, Toronto, ON, M5G 2M9, Canada**

**\* E-mail: sa2haide@uwaterloo.ca**

Implementations of the competing algorithms used for comparison are available at the websites mentioned here:

**NCDF** Adaptive Complex Diffusion Despeckling Filter. Source Code: <http://www.mathworks.com/matlabcentral/fileexchange/29801>.

**DiffusionO** Anisotropic Non-Linear Diffusion Imaging. Source Code, <http://www.mathworks.com/matlabcentral/fileexchange/25449>.

**Molecular** Hybrid Model for Molecular Image Denoising. Source Code, <http://www.mathworks.com/matlabcentral/fileexchange/21289>.

**MSVST** Multiscale Variance-Stabilizing Transform. Source Code, <https://sites.google.com/site/bowangzhang/software/msvst79.tar.gz>.

**VWNF** Versatile Wavelet Domain Noise Filtration Technique. Source Code, [http://telin.ugent.be/~sanja/Sanja\\_files/WaveletDEN.htm](http://telin.ugent.be/~sanja/Sanja_files/WaveletDEN.htm).

**PURELET** PURE-LET for Poisson Image denoising. Source Code, <http://www.mathworks.com/matlabcentral/fileexchange/31557-pure-let-for-poisson-image-denoising>.
